# Supplementary material for: Fetal Exposure to Endocrine Disrupting-Bisphenol A (BPA) Alters Testicular Fatty Acid Metabolism in the Adult Offspring: Relevance to Sperm Maturation and Quality
Source: MDPI journal article supplement (doi:10.3390/ijms24043769), 2023-02-13
Supplement: s1 [file s1]

**Table S1:** Predesigned SYBR green I rat primers and corresponding genes used for the mRNA expression analyses

| Sl. no. | Primer ID   | Gene symbol | Gene ID | Gene name                                 | Nucleotide sequences (5'-3')                                       | Ref_seqID      |
|---------|-------------|-------------|---------|-------------------------------------------|--------------------------------------------------------------------|----------------|
| 1       | R1_Fabp9    | FABP9       | 64822   | Fatty acid-binding protein 9              | F 5'- TAGCATTAGTTTCAATGGGG-3'<br>R 5'- GTTATAAGGCTCTTCACTTTCC-3'   | NM_022854      |
| 2       | R1_Cox2     | COX2        | 29527   | Cyclooxygenase 2                          | F 5'- CTCATACTGATAGGAGAGACG-3'<br>R 5'- TCGAACTTGAGTTTGAAGTG-3'    | NM_017232      |
| 3       | R1_Acsbg2   | ACSBG2      | 301120  | Long chain fatty acid-CoA ligase          | F 5'- CATGACAACATCACATGGAC-3'<br>R 5'- TTTGATAGGGATCCAGATGTC-3'    | NM_001080096   |
| 4       | R1_Lpl      | LPL         | 24539   | Lipoprotein lipase                        | F 5'- CCTACTCCTTCTTGATTTACAC-3'<br>R 5'- GAAGATGACCTTTTTCTGAGTC-3' | NM_012598.2    |
| 5       | R1_Lipe     | LIPE        | 25330   | Lipase E, hormone sensitive type          | F 5'- GTGGAAAGATGTCAGGATATG-3'<br>R 5'- GTAAATCCATGCTGTGTGAG-3'    | NM_012859      |
| 6       | R1_Slc25a20 | SLC25A20    | 117035  | Carnitine-acylcarnitine translocase       | F 5'- AGCCACCTGTTATCCACTG-3'<br>R 5'- TGTGCAAAAAGAGCCTTCCT-3'      | NM_053965.2    |
| 7       | R1_Catsper2 | Catsper2    | 366174  | Cation channel sperm-associated protein 2 | F 5'- TGTGCTTGGTTCCATTATC-3'<br>R 5'- TTGACTGGTTCCTCTTAGTG -3'     | NM_001012220   |
| 8       | R1_Catsper1 | Catsper1    | 689349  | Cation channel sperm-associated protein 1 | F 5'- AAACCCATCACCCTATGAG-3'<br>R 5'- CCAGATCTTTCCTGGTTTTG-3'      | XM_001070492   |
| 9       | R1_Fads1    | FADS1       | 84575   | Fatty acid destaurase 1                   | F 5'- GTACTTCTTCTTGATTGGAC-3'<br>R 5'- GTAAGTGAAGAAGACACGAAC-3'    | NM_053445.2    |
| 10      | R1_Fads2    | FADS2       | 83512   | Fatty acid desaturase 2                   | F 5'- CTTCTTCAATGACTGGTTCAG-3'<br>R 5'- CTTCACTGAAGTCAACATGTC-3'   | NM_031344.2    |
| 11      | R1_Elov12   | ELOVL2      | 498728  | Fatty acid elongase 2                     | F 5'- CTTGTGGTCAAAGCTTCTTC-3'<br>R 5'- GAGGTATTCTTCCACCAAAG-3'     | NM_001109118.1 |
| 12      | R1_Elov15   | ELOVL5      | 171400  | Fatty acid elongase 5                     | F 5'- TTCTTCGTAAGAACAACCAC-3'<br>R 5'- ATAGTACGAGTACATGAGGAC-3'    | NM_134382.2    |
| 13      | R1_Degs1    | DEGS1       | 58970   | Delta 4 desaturase, sphingolipid 1        | F 5'- ATCTTAGCGAAGTATCCAGAG-3'<br>R 5'- CAGAGTCATGGAATGGTTAAG-3'   | NM_053323.2    |
| 14      | R1_Scd-2    | SCD 2       | 83792   | Stearoyl-Coenzyme A desaturase 2          | F 5'- TCCAGAGGAGGTATTACAAG-3'<br>R 5'- CTGTTTACAAACGTCTCACC-3'     | NM_031841.2    |
| 15      | R1_Scd-1    | SCD 1       | 246074  | Stearoyl-Coenzyme A desturase 1           | F 5'- ATGAGAGAAGATATCCACGAC-3'<br>R 5'- AGTAAAATATCCCCCAGAGC-3'    | NM_139192.2    |
| 16      | R1_Fasn     | FASN        | 50671   | Fatty acid synthase                       | F 5'- AAAAGGAAAGTAGAGTGTGC-3'<br>R 5'- GACACATTCTGTTCACTACAG-3'    | NM_017332.2    |
| 17      | R1_Igf1     | IGF1        | 24482   | Insulin like growth factor 1              | F 5'- GCACCTCCAATAAAGATACAC-3'<br>R 5'- TGGGCTTGTGTAAGTAAAAG-3'    | NM_001082479   |
| 18      | R1_Lep      | LEP         | 25608   | Leptin                                    | F 5'- CTCATCAAGACCATTGTAC-3'<br>R 5'- TGAGGATCTGTTGATAGACTG-3'     | NM_013076.3    |
| 19      | R1_Adipoq   | ADIPOQ      | 246253  | Adiponectin                               | F 5'- TGGCGATTTTCTTTCATTTC-3'<br>R 5'- AGGATTAAGAGGAACAGGAG-3'     | NM_144744.3    |
| 20      | R1_Act-B    | ACT $\beta$ | 81822   | Actin-beta                                | F 5'- AAGACCTCTATGCCAACAC-3'<br>R 5'- TGATCTTCATGGTGCTAGG-3'       | NM_031144.3    |
