# Supplementary material for: Fetal Exposure to Endocrine Disrupting-Bisphenol A (BPA) Alters Testicular Fatty Acid Metabolism in the Adult Offspring: Relevance to Sperm Maturation and Quality
Source: MDPI journal article supplement (doi:10.3390/ijms24043769), 2023-02-13
Supplement: s1 [file s1]

**Table S2:** The primary antibodies and their dilution used in this study

| Target protein | Protein name                                     | Primary antibody    | Clonality  | Host   | Catalog & supplier  | Dilution |
|----------------|--------------------------------------------------|---------------------|------------|--------|---------------------|----------|
| FADS1          | Fatty acid desaturase 1                          | Anti-FADS1          | Monoclonal | Rabbit | #A0178 Abclonal     | 1:2000   |
| ELOVL2         | Fatty acid elongase 2                            | Anti-ELOVL2         | polyclonal | Rabbit | #A17712 Abclonal    | 1:500    |
| FABP3          | Fatty acid binding protein 3                     | Anti-FABP3          | Polyclonal | Rabbit | #AG25A0040 Adipogen | 1:4000   |
| FABP4          | Fatty acid binding protein 4                     | Anti-FABP4          | Polyclonal | Rabbit | #PA5-30591 Thermo   | 1:2500   |
| FABP5          | Fatty acid binding protein 5                     | Anti-FABP5          | polyclonal | Rabbit | #A6373 Abclonal     | 1:1000   |
| FABP7          | Fatty acid binding protein 7                     | Anti-FABP7          | Polyclonal | Rabbit | #A11604 Abclonal    | 1:1000   |
| ADRP           | Adipocyte differentiation related protein        | Anti-ADRP           | Polyclonal | Rabbit | #PA1-16971 Thermo   | 1:3000   |
| PPAR $\alpha$  | Peroxisome proliferator activated receptor alpha | Anti-PPAR $\alpha$  | Monoclonal | Mouse  | #MA1-822 Thermo     | 1:1000   |
| PPAR $\gamma$  | Peroxisome proliferator activated receptor gamma | Anti-PPAR $\gamma$  | Monoclonal | Mouse  | #SC-7273 Santacruz  | 1:500    |
| Actin          | Beta actin                                       | Anti- $\beta$ Actin | Monoclonal | Mouse  | #A5316 Sigma        | 1:10000  |
